# Supplementary material
Source: PubMed Central journal article supplement (PMC524791)
Supplement: mbc_E04-07-0600_1.pdf [file mbc_E04-07-0600_1.pdf]

**Supplemental Table I. Primers used in this study**

| Primer  | Sequence                                                                                   |
|---------|--------------------------------------------------------------------------------------------|
| oRAX11  | 5' GGACGCAAGCTTCCAGAACGGTTTATCGCA 3'                                                       |
| oRAX12  | 5' GGACGCAAGCTTTTGTGTCAGCGGAGGACA 3'                                                       |
| oRAX13  | 5' GGCCGGATCCTTCATGATGAATGGGACGC 3'                                                        |
| oRAX14  | 5' GGCCGGATCCGTCGTGTATGATGTAATCC 3'                                                        |
| oRAX15  | 5' CTTGCGGCCGCACATGATGAATGGGACGCT 3'                                                       |
| oRAX16  | 5' TGTGCGGCCGCAAGGAAGAGCTCAGCAAAG 3'                                                       |
| oRAX111 | 5' GTAGTGGGTGCCACTGCCGCATTCACAGTTATTTTCAGCTGTGTT<br>CCCGGCCGTCGTGTACGGATCCCCGGGTTAATTAA 3' |
| oRAX112 | 5'GTCACGCGCTATGGAAATATGCGGTGCACAGGTGTTTTTATAGGG<br>GGGTGATGGATTACAGAATTCGAGCTCGTTTAAAC 3'  |
| oRAX21  | 5'TCTTCCGCGGCCAATAATACATCTCATATG 3'                                                        |
| oRAX22  | 5'CCGACCGCGGCAGTATTGGTAACATTCCAA3'                                                         |
| oRAX23  | 5'CTCCGGATCCAGAGACGATGAACAAACATT 3'                                                        |
| oRAX24  | 5'CTGCGGATCCTTATGAAGTTTGTCTAATCG 3'                                                        |
| oRAX25  | 5'GTTACCTGGCAATGCTAGCTCTATTAGCTC 3'                                                        |
| oRAX26  | 5'CTGGCGGCCGCCGACAACTTCATAAGTTT 3'                                                         |
| oRAX27  | 5'TCCGCGGCCGCTAATCGGGGTTGTATTATA 3'                                                        |
| oRAX28  | 5'CCGACTCGAGTATTGGTAACATTCCAAGTG 3'                                                        |
| oBUD81  | 5'CCAGCTCGAGAGGCCAAACCGGATAGTCCT 3'                                                        |
| oBUD82  | 5'CCACGGATCCGCTAAGAAGGAAGCCGGCGA 3'                                                        |
| oBUD91  | 5'GGTCCTCGAGCACTATTCAACAGTGAATGG 3'                                                        |

oBUD92 5'GTCCGGATCCTTGGGGATTCTTCTTTCTG 3'

---

**Supplemental Table II. Budding patterns of wild-type and mutant strains**

| Strain  | Relevant genotype                          | Budding Pattern <sup>a</sup> |                      |                     |
|---------|--------------------------------------------|------------------------------|----------------------|---------------------|
|         |                                            | Axial <sup>b</sup>           | Bipolar <sup>c</sup> | Random <sup>d</sup> |
| YEF473A | <b>a</b> wild type                         | 94                           | 4                    | 2                   |
| HPY440  | <b>a</b> <i>axl1</i>                       | 23                           | 70                   | 7                   |
| HPY543  | <b>a</b> <i>axl1 rax1</i> □                | 88                           | 7                    | 5                   |
| HPY615  | <b>a</b> <i>axl1 GFP-RAX1</i>              | 25                           | 70                   | 5                   |
| HPY850  | <b>a</b> <i>axl1 RAX1-Myc<sub>13</sub></i> | 13                           | 75                   | 12                  |
| HPY639  | <b>a</b> <i>axl1 rax2</i> □                | 83                           | 9                    | 8                   |
| HPY729  | <b>a</b> <i>axl1 RAX2-GFP</i>              | 23                           | 70                   | 7                   |
| HPY730  | <b>a</b> <i>axl1 RAX2-HA<sub>3</sub></i>   | 26                           | 71                   | 3                   |
| YEF473  | <b>a</b> /□ wild type                      | 2                            | 78                   | 20                  |
| HPY496  | <b>a</b> /□ <i>rax1</i> □/ <i>rax1</i> □   | 18                           | 38                   | 44                  |
| HPY614  | <b>a</b> /□ <i>GFP-RAX1/GFP-RAX1</i>       | 0                            | 81                   | 19                  |
| HPY814  | <b>a</b> /□ <i>RAX2-GFP/RAX2-GFP</i>       | 0                            | 80                   | 20                  |

<sup>a</sup> Budding patterns were determined by scoring cells with more than three scars. About 200 cells were counted for each strain, and the percentage of each pattern is shown.

<sup>b</sup> One or more chains of bud scars similar to those of the axial pattern were present.

<sup>c</sup> Bud scars were concentrated at one or both poles of the cell (as in the bipolar pattern).

<sup>d</sup> One or more bud scars were present at seemingly random sites.
